# Supplementary material for: Restricting Promiscuity of Plant Flavonoid 3′-Hydroxylase and 4′-O-Methyltransferase Improves the Biosynthesis of (2S)-Hesperetin in E. coli
Source: PubMed Central journal article supplement (PMC10311525; doi:10.1021/acs.jafc.3c02071), 2023-06-13
Supplement: jf3c02071_si_001.pdf [file jf3c02071_si_001.pdf]

## Supporting Information

### **Restricting promiscuity of plant flavonoid 3'-hydroxylase and 4'-O-methyltransferase improves the biosynthesis of (2S)-hesperetin in *E. coli***

Juan Liu<sup>a,b,c,d</sup>, Zhiqiang Xiao<sup>a,b,c</sup>, Siqi Zhang<sup>a,b,c</sup>, Zhen Wang<sup>a,b,c</sup>, Yun Chen<sup>d\*</sup>, Yang Shan<sup>a,b,c\*</sup>

a Longping Branch, College of Biology, Hunan University, Changsha 410125, China

b Agriculture Product Processing Institute, Hunan Academy of Agricultural Sciences, Changsha 410125, China

c Hunan Key Lab of Fruits & Vegetables Storage, Processing, Quality and Safety, Hunan Agricultural Products Processing Institute, Changsha 410125, China

d Department of Life Sciences, Chalmers University of Technology, SE412 96, Gothenburg, Sweden

**Table S1.** Codon-optimized nucleotide sequences

| Genes | Codon optimized nucleotide sequences                                                                                                                                                                                                                                                                                                                                                                                                                                                                                                                                                                                                                                                                                                                                                                                                                                                                                                                                                                                                                                                                                                                                                                                                                                                                                                                                                                                                                                                                                                                                                                                                                                   |
|-------|------------------------------------------------------------------------------------------------------------------------------------------------------------------------------------------------------------------------------------------------------------------------------------------------------------------------------------------------------------------------------------------------------------------------------------------------------------------------------------------------------------------------------------------------------------------------------------------------------------------------------------------------------------------------------------------------------------------------------------------------------------------------------------------------------------------------------------------------------------------------------------------------------------------------------------------------------------------------------------------------------------------------------------------------------------------------------------------------------------------------------------------------------------------------------------------------------------------------------------------------------------------------------------------------------------------------------------------------------------------------------------------------------------------------------------------------------------------------------------------------------------------------------------------------------------------------------------------------------------------------------------------------------------------------|
| FjTAL | ATGAACACCATTAATGAATACTTGAGTTTAGAAGAATTCGAAGCAATAATCTTCGG<br>TAACCAAAAAGTAACTATCTCTGATGTTGTCGTAAACAGAGTTAACGAAAGTTTAA<br>ACTTCTTAAAGGAATTTTCTGGTAATAAGGTTATATATGGTGTAACACTGGTTTCG<br>GTCCAATGGCTCAATACAGAATCAAGGAATCTGATCAAATCCAATTGCAATACAAT<br>TTGATAAGAAGTCATTCTTCAGGTAAGTAAACCATTATCTCCTGTTTGTGCTAAG<br>GCTGCAATCTTGGCAAGATTGAACACATTGTCTTTAGGCAACTCAGGTGTTACCCCA<br>TCTGTTATTAATTTGATGTCTGAATTGATAAACAAGACATCACTCCTTTGATATTC<br>GAACATGGTGGTGGTGCATCTGGTGACTTGGTCCAATTGTCCTTGGCCTTA<br>GTATTGATAGGTGAAGGTGAAGTTTTCTATAAAGGTGAAAGAAGACCAACACCTGA<br>AGTCTTCGAAATCGAAGGTTTAAAGCCTATACAAGTAGAAATCAGAGAAGGTTTAG<br>CTTTGATTAATGGTACTTCTGTCATGACAGGTATAGGTGTTGTCAACGTATACCATG<br>CTAAGAAATTGTTGGATTGGTCATTGAAGTCCAGTTGTGCCATTAATGAATTGGTTC<br>AAGCATATGATGACCATTTCTCTGCAGAATTGAACCAAACCAAGAGACACAAGGGT<br>CAACAAGAAATCGCATTGAAGATGAGACAAAATTTGTCCGATAGTACATTGATCAG<br>AAAGAGAGAAGACCACTTATACTCAGGTGAAAACACCGAAGAAATTTCAAAGAA<br>AAGGTTCAAGAATACTACTCCTTGAGATGCGTCCCAAAATCTTGGGTCTGTATTG<br>GAAACTATTAATAACGTTGCCTCAATCTTGAAGATGAATTCAATTCCGCTAACGA<br>TAACCAATCATCGACGTTAAAAATCAACATGTTTATCACGGTGGTAACTTCCATG<br>GTGACTACATTTCTTTAGAAATGGACAAATTGAAGATAGTTATCACAAAATTGACC<br>ATGTTGGCTGAAAGACAATTGAACTACTTGTGAACTCAAAGATTAACGAATTGTT<br>GCCACCTTTCGTTAATTTGGGTACATTGGGTTTTAACTTCGGTATGCAAGGTGTTCA<br>ATTCACCGCCACTTCAACTACAGCTGAATCCCAAATGTTGAGTAACCAATGTACG<br>TTCATTCCATCCCTAACACAACGATAACCAAGACATCGTCTCTATGGGTACCAACT<br>CAGCCGTCATTACTTCCAAAGTAATAGAAAACGCATTTCGAAGTTTTGGCCATCGAA<br>ATGATCACAAATTGTCCAAGCTATCGATTACTTGGGTCAAAGGACAAGATCTCTTCT<br>GTTTCTAAGAAATGGTACGATGAAATAAGAAACATAATCCCAACCTTTAAGGAAGA<br>CCAAGTTATGTACCCTTTCGTACAAAAGGTTAAGGATCATTGATTAACAATTA |
| Pc4CL | ATGGGAGACTGTGTAGCTCCCAAAGAAGATCTGATTTTTTCGTAGCAAGCTCCAGA<br>TATCTACATTCCGAAACATCTGCCGCTGCACACCTACTGCTTTGAAAATATCTCGAA<br>AGTTGGCGACAAGTCTTGTCTTATCAACGGCGCTACGGGTGAGACGTTTACCTACTC<br>CCAAGTGAATTGCTGTCTCGTAAAGTGGCTTCAGGCCTGAACAAATTGGGCATCC<br>AACAAGGTGACACCATTATGTTGCTGTTACCCAACAGCCCGGAGTATTTCTTTGCTT<br>TTCTGGGTGCTAGCTATCGCGGTGCGATTAGTACGATGGCAAATCCGTTTTTCACCA<br>GCGCAGAAGTTATTAACAGCTGAAAGCATCCCAAGCTAAGCTCATTATTACCCAG<br>GCGTGCTATGTGGATAAGGTGAAAGATTACGCGGCGGAGAAAAACATTCAAATCA<br>TCTGCATTGACGACGCGCCGAGGATTGTCTGCACTTTAGCAAGCTGATGGAAGCA<br>GATGAATCCGAAATGCCGGAGGTAGTCATTAACAGCGATGACGTTGTAGCCCTCCC<br>GTACTIONCAGCGGCACGACCGGCTTGGCGAAAGGTGTTATGCTGACCATAAAGGTT<br>TGTTACCAGTGTGCCCAGCAAGTGGACGGCGACAACCCGAACCTGTATATGCAC<br>AGCGAAGACGTTATGATTTGCATCCTGCCGCTATTCCACATTTACTCGCTGAACGCG<br>GTGCTGTGTTGTGGTTTACGTGCAGGCGTTACCATACTGATTATGCAGAAATTCGAC                                                                                                                                                                                                                                                                                                                                                                                                                                                                                                                                                                                                                                                                                                                                                                                                  |

---

ATCGTGCCGTTCCCTGGAAGTATCCAGAAAACAAGGTGACTATCGGTCCGTTTGT  
CCACCGATAGTGCTGGCGATCGCGAAGTCTCCGGTGTGGACAAGTACGATCTTC  
TAGCGTTAGAACCGTGATGAGCGGCGCTGCGCCGTTGGGCAAAGAATTGGAGGAT  
GCTGTGCGTGCGAAGTTCCCGAATGCGAAGCTGGGTGAGGGTTATGGTATGACCGA  
AGCGGGTCCGTTCTGGCAATGTGCCTGGCATTGCTAAGGAGCCGTATGAAATTA  
AGTCCGGAGCCTGCGGTACGGTAGTCCGCAACGCGGAGATGAAGATCGTTGATCCA  
GAGACAAATGCGAGCCTGCCGCGTAACCAGCGTGGTGAGATCTGCATTGTTGGGGA  
CCAGATCATGAAAGGTTACCTGAATGATCCGGAAAGCACCCGCACCACCATCGACG  
AGGAGGGTTGGCTGCACACCGGTGACATCGGCTTCATTGACGACGACGATGAGTTG  
TTCATCGTCGATCGTCTGAAAGAAATTATTAAGTACAAAGGCTTTCAGGTAGCTCC  
GGCAGAGTTGGAGGCGCTGTTACTGACCCATCCGACCATCTCCGATGCCGCGGTGG  
TCCCTATGATTGACGAAAAAGCCGGTGAAGTCCCGGTGGCCTTCGTGGTTTGTACC  
AATGGTTTCACTACGACTGAAGAGGAGATCAAGCAATTTGTTAGCAAAACAAGTTGT  
GTTTTATAAGCGCATCTCCGCGTTTTCTTCGTGGACGCGATCCCGAAGAGCCCGTC  
CGGCAAAATACTGCGCAAGGATTTGCGGGCGCGTATCGCGAGCGGCGATCTCCCA  
AGTAA

---

PhCHS

ATGGTAACAGTTGAAGAGTATAGGAAAGCTCAACGTGCAGAAGGCCAGCCACCG  
TTATGGCGATTGGCACTGCGACCCCGACCAACTGCGTCGATCAGAGCACCTACCCG  
GACTACTACTTCCGCATTACGAACTCCGAGCACAAAACCGATCTGAAGGAGAAGTT  
TAAACGCATGTGTGAAAAGAGCATGATCAAGAAACGTTATATGCACTGACTGAGG  
AAATTCTGAAAGAGAACCCGTCTATGTGCGAGTATATGGCTCCGAGCCTGGACGCA  
CGTCAGGATATTGTCGTGGTTGAGGTACCGAAACTGGGTAAAGAGGCTGCTCAAAA  
AGCGATCAAGGAGTGGGGCCAGCCGAAGAGCAAAATCACCCACTTGGTGTTTTGT  
CCACCAGCGGTGTGGACATGCCGGGCTGCGACTACCAGCTGACGAAACTGTTAGGT  
CTCCGCCCGTCTGTAAACGTCTGATGATGTATCAACAGGGTTGTTTTGCAGGTGGC  
ACGGTTTTGCGTCTTGCCAAGGATCTCGCGAAAACAACAAGGCGCCCGTGTCT  
GGTTGTGTGCAGCGAAATCACCGCAGTTACCTTCCGCGTCCAAATGACACCCACC  
TGGACTCTTTGGTGGGCCAAGCGCTGTTTGGCGATGGTGCGGGTGCGATTATCATC  
GGCAGCGATCCGATTCCGGGGTGAACGTCCGCTGTTTCGAGCTGGTGAGCGCTGC  
GCAAACCTTGCTGCCGACTCCCATGGTGCATTGATGGTCATCTGAGAGAAGTCG  
GTCTGACATTTTCATCTGTTGAAGGACGTTCCGGGTCTTATCAGCAAGAACATCGAA  
AAATCGTTGGAGGAGGCGTTTCGCCCTCTGTCAATTAGCGACTGGAATCCCTGTT  
TGGATAGCCCATCCGGGCGGTCCGGCAATCCTGGACCAGGTTGAGATCAAGCTGGG  
CTTGAAGCCGGAAAAACTTAAGGCGACCCGTAATGTTCTGTCTAACTATGGTAATA  
TGTCAGCGCCTGCGTTTTGTTTCATCTGGATGAAATGCGTAAAGCGTCGGCGAAG  
GAGGGACTGGGCACGACCGGTGAAGGTCTGGAATGGGGTGTACTGTTCCGGTTCGG  
CCCAGGCTTGACGGTCAAACCGTGGTGTGACAGCGTGGCTACCTAA

---

MsCHI

ATGGCGCAAGTATTACAGCTATAACTGTAGAGAACCTGGAGTACCCGGCGGTGCT  
TACCTCTCCGGTGACCGGTAAGTCCTATTTCTGGGCGGTGCCGGTGAACGTGGTCT  
CACGATTGAGGGAAACTTCATCAAATCACTGCGATTGGCGTTTATTTGGAGGACA  
TCGCTGTCGCAAGCTTGGCTGCGAAATGGAAGGGTAAGTCGAGCGAAGAGCTGTTG  
GAAACCCTGGATTTTTACCGTGATATTATCAGCGGTCCGTTTAAAAGCTGATCCGC  
GGCTCAAAAATCCGTGAGCTGTCTGGCCAGAATACAGCAGAAAAGGTGATGGAAA  
ATTGTGTTGCCATCTGAAGAGCGTTGGCACGTATGGTGTGATGCAGAGGCGGAGGCT

---

---

ATGCAGAAATTCGCGGAAGCCTTCAAGCCGGTTAATTTCCCGCCTGGTGCGTCTGT  
ATTCTACCGCAAAGCCCGGACGGCATCCTGGGTCTGAGCTTTAGCCCGGACACCT  
CGATTCCGGAGAAAGAAGCGGCCCTGATTGAAAACAAAGCGGTGTCCAGCGCAGT  
GTTGGAGACCATGATTGGCGAGCACGCTGTGTCCCCGGACCTGAAACGTTGCTTGG  
CTGCGCGTCTGCCGGCATTACTTAATGAAGGTGCGTTTAAGATCGGCAACTAA

---

trLbF3'H

TCCGTAAACGCTACCCGCTGCCGCTGCCGCCGGTCCGAAACCGTGGCCGATCAT  
CGGTAACATCGTTACCTGGGTCCGAAACCGCGTCAGTCTACCGCGGCGATGGCGC  
GTACCTACGGTCCGCTGATGCACCTGAAAATGGGCTTCGTTGACGTGGTGGTTGCG  
GCGAGCGGCAGCGTTGCGGCACAGTTCCTGAAAACCCACGATGCTAACTTCTCTAG  
CCGTCCGCCGAACTCTGGTGCGAAACACCTGGCGTACAACCTACCACGACCTGGTTT  
TCGCGCCGATGGCCCCGCTTGGCGCATGCTGCGTAAAATCTGCTCCGTGCACCTGT  
TCTCCGCTAAAGCGCTGGATGATTTCCGTTACGTTTCGTGAGGACGAAGTGCGTACCC  
TGACCCGTGCGCTGGCGTCTGCCGGTTCAGACCCCGGTGAAACTGGGTTCAGCTGCTG  
AACGTTTGC CGGACCAACGCGCTGGCTCGCGTTATGCTGGGTAAACGTGTTTTCGC  
GGACGGTACCAGCGGCATCGATCCGCAGGCTGAAGAATCAAATCTATGTGCGTTG  
AAATGATGGTTCTGGCTGGTGTGTTCAACATCGGCGATTCATCCCGGCTCTGGACT  
GTCTGGATATCCAGGGTGTTCGCGCAAAAATGAAAAAAGTGCACGCGCGTTTCGAC  
GCGTTCCTGACCAGCATCCTGGAAGAACACAAAGGCAAACGCTTCGGCGAAACCA  
AAAAGGAACAGGGTGATCTGCTGAGCACCCCTGATCTCTGAAAAACGAAGATGAT  
GATAACGGCGGCAAACCTGACCGATACCGAAATCAAAGCGCTGCTGCTGAACCTGTT  
CGTTGCGGGCGCCGATACTTAGCAGCACCGTTGAATGGGCAATTGCAGAACTGA  
TCCGTAACCCGCGCATCCTGGCGCAGGCGCAGGAAATTGATAAAGTTGTCGGC  
AAAAACCGTCTGGTTATGGAATCTGATCTGGCGCAGCTGACCTACCTGGAAGCTAT  
TGTGAAAGAAACCTTCCGTCTGCACCCGTCCACCCCGCTGTCCTGCCGCGTATCGC  
CTCTGACTCTTGCAGATCAACGGTACTTCATCCCGAAAGGTAGCACCCCTGCTGGT  
GAACGTTTGGGCTATCGCACGTGATCCGAATGAATGGGCTGATCCGTTGGAATTCC  
GCCCCGAAACGCTTCCGTGCCGGTGGTAAAAACCGAAAGTTGACGTTAAAGGCAA  
CGATTCGAAGTGATCCCGTTCCGTGCGGGCCGTCGTATCTGCGCAGGTATGTCTCT  
GGGTATCCGTATGGTGCAGCTGATGACGGCGACCCTGATCCACTCTTTCAACTGGA  
ACCTGCCGAGCGGTGAGCTGCCGAAAAACTGAACATGGAAGAAGCATTCCGGCCT  
GACCCTGCAGCGTGGGACCCGCTGACCGTTCACCCGAGCCCGCGCTGGAAGCGC  
AGGTTTACGGCATGTAA

---

trCnF3'H

TCAACCGCCACCCGCTCCGCTGCCGCCGGTCCGAAACCGTGGCCGGTGATCGG  
CAACCTGCCGCACCTGGGTACCATGCCGCATCACAGCATCGCGGCTATGGCACGTA  
CCTACGGTCCGCTGATGCACCTGCGTCTGGGTCTGGTTGATGTGGTTGTGGCTGCGA  
GCGCGAGCGTGGCGGCGCAGTTCCTGAAAACCCACGATGCGAACTTCTCCAGCCGT  
CCGCCGAATAGCGGTGCTAAACACATCGCATATAACTATCAGGATCTGGTTTTTCGC  
TCCGTACGGTCCGCGTTGGCGTATGCTGCGTAAAATCTGTAGCGTTCATTGTTCAG  
CACCAAAGCTCTGGACGACTTCCGTACGTTCCGAGGAAGAAATCGCGATTCTGA  
CCCGTGCCTGGCGTCCGCGGGCCAGGCGGCAGCTGTAAACCTGGGCCAGCTGCTG  
AACGTTTGCACCACCAACGCGCTGGGTGCTGTGATGCTGGGTACCCGTGTTTTCGGC  
GATGGCTCCGGTAGCGGCGACCCGAAAGCTGATGAATTCAAAGAAATGGTTGTGG  
AACTGATGGTGTGGCGGGTGTTCACCATCGGTGATTCGTGCCGGCGCTGGAG  
TGGCTGGATCTGCAGGGCGTTGCGAGCAAAAATGAAAAAAGTGCATGCGCGCTTCGA

---

---

CAGCTTCCTGAACAAAATCCTGGAAGAACATAAAAATTAACTACTCTGGCTCCGGCG  
CGCAGAAACACACCGATCTGCTGAGCACCTGATCAGCCTGAAAGATGATGCTGAT  
GGCGAAGGCGGCAAACCTGACCGACATCGAAATCAAAGCGCTGCTGCTGGACCTGTT  
CACCGCGGGCACCGACACCTCTAGCAGCACCGTGAATGGGCGATCGCGGAACTG  
ATCCGTCACCCGAAAATCCTGGCTCAGGCGAAACAGGAACTGGATTCTATCGTTGG  
TCCGGATCGTCGTGTTACCGAATCTGATCTGGCGCAGCTGACCTTCCTGCAGGCTAT  
CATTAAAGAAACCTTCCGTCTGCACCCGTCCACCCCGCTGAGCCTGCCGCGCATGG  
CGTCTGATTCTTGCGAAATCAACGGCTACTTTATTCCGAAAGGCTCTACCCTGCTGG  
TTAACGTTTGGGCGATCGCGCGTATCCGGATGCGTGGGCTGAACCGCTGGAATTC  
CGTCCGGAACGTTTCCCTGCCGGGCGGCGAAAAACCGAACGTTGACGTTTCGTGGTAA  
CGACTTCGAAGTGATTCCGTTTGGTGCGGGCCGTCGCATCTGCGCTGGTATGAGCCT  
GGGTCTGCGTATGGTTCAGCTGCTGACCGCCACCCTGGTTCACGCATTCAACTGGG  
ATCTGGCGGATGGTCAGTCTGCGGAAAAACTGAAGATGGATGAAGCGTACGGTCTG  
ACCCTGCAGCGTGTGCGCCGCTGATGGTTCATCCGCGTCCGCGTCTGGCGCCGCA  
CGTGTACCAGGCGTAA

---

trCaF3'H AACCGCCGTAGCCTGCCGCTGCCGCCGGGCCGAAACCGTGGCCGCTGATCGGTAA  
CCTGCCGCACCTGGGCTCTAAACCGCACCACTATCGCCGCGTGGCCCGTACCC  
ACGGCCCGCTGATGCACCTGCGTATGGGCTTCGTTGATGTTATCGTTGCAGCGAGC  
GCCAGCGTTGCGTCCCAGTTCCTGAAAGTTCATGATGCTAACTTCTCTAGCCGCCC  
CCGAACTCCGGTGCTAAATATATCGCGTATAACTACCAGGATCTGGTGTTCGTCCG  
TACGGCCCCGAAATGGCGTATGCTGCGTAAAATCTCTCCGTTACCTGTTCTCCGGT  
AAAGCGCTGGACGATTATCGCCACGTTTCGTCAGGGCGAAGTTGCGGTGCTGGCGCG  
TGCGCTGGTTAGCGCGGGTACCCAGTCTGAACCGGTTAACCTGGCGCAGCTGCTGA  
ACGTGTGCACCGTGAACGCGCTGAGCCGTGTGATGCTGGGTCGTCGCGTTTTCCGGC  
GATGGTAGCGGCGGTTGCGATGCGAAAGCTGATGAATTCAAATCCATGGTTGTTGA  
AGTAATGGTTCTGGCGGGTGTCTGAACCTGGGTGATTTTATTCCGAGCCTGGAATG  
GCTGGATCTGCAGGGCGTTGCAGCAAAAATGAAAAAACTGCACCAGCGCTTCGATA  
CCTCCTGACCGGTATCCTGGAAGAACACAAAATGAAAAAAGGCCAGGATGGTTCT  
GAAAACCGAGAAAGATATGCTGAGCCTGCTGATCTCCCTGATGGATAACAACACCGC  
GGATGAAGAAGGCGGCAAACCTGACCGAAACCGAAGTGAAGCGCTGCTGCTGAAC  
ATGTTACCGCTGGTACTGATACCTCCAGCTCTACCGTTGAATGGGCTATCGCTGAA  
CTGATCCGTCATCCGCAGATGCTGGCGCAGGTGAAACACGAACTGGATAGCGTGGT  
TGTCGTGATCGCCTGGTTACCGAACTGGATCTGCCCGCTCTGACCTACTCCAGGC  
GGTAATCAAAGAAACCTTCCGTCTGCATCCGAGACCCCGCTGAGCCTGCCGCGTA  
TTGCAGCAAAAGACTGCGAAATCAACGGCTACCGTATCCCGAAAGGTTCTACTCTG  
CTGGTTAACGTGTGGGCGATTGCGCGGATCCGAACGAATGGACCGAACCGCTGGT  
GTTCTGACC CGGAACGTTTCCCTGCCGGGTGGTGAAGAATCTAACGTGGATGTGAAAG  
GTTCTGATTACGAACTGATCCCGTTCCGGCGGGTTCGTCGATCTGCGCGGGTATGA  
GCCTCGGTCTGCGCATGGTTCAGCTGCTGACCGCGACCCTGGTTCACGCATTGATT  
GGGAACTGCCGCGTGGCTGATGCCGAAAAAACTGAACATGGAAGAAGCGTACGG  
TCTGACCCTGCAGCGTGCGGCGCCGCTGGTTGTTACCCGCGTCCGCGCCTGAGCC  
GAACGCGTATGGTGTTCCTAACTAA

---

trThF3'H CCGGCGCACCGTCTGCCGCCGGGCCGCGTGGTTGGCCGATCCTGGGTAACTGCC  
GCAGCTGGGTCCGAAACCGCACCAAGACCCTGCACGCGCTGAGCAAAGCACACGGT

---

---

CCGCTGTTCCCTGCTGCGTCTGGGCTCTGTTGACGTTGTTGTGGCGGCCAGCGCGGCG  
GTTGCGGCTGCGTTCCTGCGTCAGCATGATGCGATCTTCTCTAACCGTCCGCCGAAC  
TCCGGTGCAGAACACATCGCGTACAACCTACCAGGACCTGGTTTTTCGCACCGTATGG  
TCCGCGCTGGCGTCACCTGCGTAAACTGTGCAGCCTGCACTTGTTCAGCTCCAAAGC  
GCTGGATGATCTGCGCCCATCCGTGAACAGGAAATTCAGCGTCTGACTCGTTCTCT  
CCTGGTTGGTCTGCGGTTAACCTGGGTGAAGCTGTAAACGTGTGTGCGACCAACG  
CTCTGGCTCGTGCAGCCGTTGGCTGGCGTGTGTTCTGTTGGCGAAGGCCAAGATACT  
GCTGCGGAAGAATTTAAAGAAATGGTTCTGGAAATCATGAAACTGGCCGGCGTTTT  
CAACATCGGTGACTTTCGTGCCGGGTATTGGCTGGATGGATCTGCAGGGTGTGTTG  
GCAAATGAAAAACTGCACAAACGCATGGATGCGTTCCTGGATAAACTGATTAAC  
GAACACAAACGCGGCTCTGGCGGCCGTGATCTGCTGTCTGTGCTGGTTAGCCTGAA  
AGACGACGAAGGTGAAGATGAAGCGAACAACTGAGCCACACCGAAATCAAAGCA  
CTGCTGCTGAACCTGTTACCGCTGGCACCGATAACCACCAGCTCTACCGTTGAATGG  
GCTCTGGCGGAACTGATCCGTACCCGACGCTGCTGCACAAAGCGCAGCAGGAACT  
GGACAACGTGGTGGTTCGCCAGCGTCTGGTGTCTGAAACTGACCTGCCGAACCTGC  
CGTTCCTCCAGGCGATCATTAAAGAGACCTTCCGCTGCACCCGCTACCCCGCTGA  
GCCTGCCGCGCATTAGCAGCGAACCGTGCAGAAATCAACGGTTATTATATCCCGAAA  
AACGCAACTCTGCTGGTTAACGTTTGGGCAATTGCTCGTGATCCGGCTGTATGGAG  
CGATCCGCTGGAATTCAAACCGAACGTTTTATGCCGGGCGGTGAAAAAGCGAATG  
TTGATGTGAAAGGCAACGACTTTGAAGTTATTCGTTTCGGCGCAGGCCGTGCTATCT  
GCGCAGGCATGTCCCTGGGCTGCGTATGGTGCAGTTCATGACCGCAACCCTGGTT  
CACGGCTTCGAATGGGGCCTGCCGGAAGGTGTTAACGCTGAAAACTGGATATGGA  
AGAAAGCTACGGCTGACCTGCAGCGTAAAGTTCCGCTGACCGTTACGCCGATCC  
CGCGTCTGGTTCTGTTGCGTATGAAGTTGTTGAATGCTAA

---

trNiF3'H

TTCGTAACGTTATCCGCTGACCCTGCCGCCGGTCCGAAACCGTGGCCGATTATC  
GGTAACCTGGTGCACATGGGTCCGAAACCGCACCGTCTACCGCGCAATGGCCCCG  
TACCTACGGTCCGCTGATGCACCTGAAAATGGGTTTTGTTGATGTGGTGGTGGTTGC  
GAGTGCCTCCGTGGCGGCGCAGTTCCTGAAAACCCATGATGCGAACTTCTCTAGCC  
GCCCCCGAACTCTGGCGCGAAACACCTGGCGTATAACTATCAGGATCTGGTTTTTC  
GCTCCGATGGTCCGCGTTGGCGTATGCTGCGTAAAATTTGCTCTGTGCACCTGTTTC  
TCCGCGAAAGCTCTGGATGACTTCAGCCACGTTCCGCCAGGATGAAGTTCCGACCCCT  
GACCCGTGCACTGGCGAGCGCAGCGCAGAAACCGGTGAAACTGGGTCAGCTGCTG  
AACGTTTGCACCACCAACGCGCTGGCGCAGGTGATGCTGGGTCGTCGCTGTTCCG  
GGATGCAAACGGTGGTGTGATCCGCGAGGCAGAAGAATTCAAATCTATGGTGGTGG  
AAGCAATGGTTCTGGCGGGTGTGTTCAACGTGGGCGACTTCATCCCGGCCCTGGAT  
TGGCTGGATATCCAGGGCGTTGCGGCAAAAATGAAAAACTGCATGCTCGCTTTGA  
TGCCTTCTGACTTCTATCCTGGAAGAACACAAATCTAACCAGTTTGGCGAAACCA  
AAGAACACGAAGATCTGCTGAGCACCTGATCTCCCTGAAAAAAGAAGAAGGCGA  
CAACGAAGGCGGTAAACTGACCGATTCTGAAATTAAGCGCTGCTGCTGAACCTGT  
TCATTGCGGGTACCGATACTCTAGCAGCACTGTAGAATGGGCGATCGCGGAACTG  
ATCCGTAACCCGCGTATCCTGGCACAGGCACAGCATGAAATTGATAAAGTTGTTGG  
TAAAAACCGTCTGGTTATGGAATCTGATCTGGCGCAGCTGACCTACCTGGAAGCTA  
TCGTTAAAGAAACCTGCGCCTGCACCCGAGCACCCCGCTGTCTCTGCCGCGTATTG  
CGAGCGAATCCTGTGAAATCAACGGCTATTTTATCCCGAAAGGTTCTACCCCTGCTG

---

---

GTAAACGTTTGGGCGATCGCGGTGATCCGAACGAATGGGCAGACCCGCTGGAATT  
CCGTCCGGAACGTTTCCTGCCGGGCGGTGAAAAACCGAAAGTTGACGTTTCGTGGTA  
ACGACTTTGAAGTGATCCCGTTCGGTGCGGCCGTCGCATCTGCGCTGGTATGAAC  
AGCGGTATCCGTATGGTGCAGCTGATGACCGCTACCCTGATCCACGCTTCAACTG  
GGATCTGTCCATCGGCCAGTCCCCGAAAACTGAACATGGAAGAAGCGTTCGGTC  
TGACCCTGCAGCGCGGACCCGCTGGTTGTTCACCCGTGCCTGCGTCTGGAAGCG  
CAGGCGTACATCGGCTAA

---

trSIF3'H TCCGTAAACGTTACCCGGTTCGCTGCCGCCGGGCCGAAACCGTGGCCGATCAT  
CGGTAACATCATCCAGCTGGGCCGAAACCGCACCAGTCCACCGCTTCTATGGCGC  
GTACCTATGGCCCGCTGATGCACCTGCGTATGGGTTTCGTTGATGTTGTGGTGGCGG  
CGAGCGGAGCGTAGCGGCGCAGTTTCTGAAAAACCACGACGCGAACTTCTCCTCT  
CGTCCGCCGAACTCTGGCGCGAAACACATGGCGTATAACTACCACGACCTGGTTTT  
CGTCCGTACGGCCCGCTTGGCGTATGCTGCGCAAATTTGCAGCGTTCACCTGTT  
CTCTACTAAAGCTCTGGATGATTTTCGTCATGTCCGTCAGGAAGAAGTTCGTACCCT  
GACTCGTGC ACTGGCAAACGCGGGTCAGAACCCGATTA AACTGGGCCAGCTGCTGA  
ACGTTTGCACCACCAACGCGCTGGCTCGTGTATGCTGGGTAAACGTGTGTTTGCTG  
ATGGCACCACCGGTATGGACCCGAGGCAGAAGAATTCAAATTGATGGTTGTGGA  
AATGATGGTTCTGGCGGGCGTTTTCAACATCGGCGATTCATTCCGGCGCTGGATTG  
GATGGATATCCAGGGCGTTGCGGAAAAAATGAAAAAACTGCACGCACGTTTTGAC  
GCCTTCTGACCACCATCCTGGAAGAACATAAAGAAAAACGTGTTGGCGAAAGCA  
AAGAACAGGGTGACCTGCTGAACACCCTGATTAGCCTGAAAAACGAAGAAGATGA  
TAACGGCGGCAAACCTGACCGATACCGAAATTAAGCGCTGCTGCTGAACCTGTTCA  
TCGCCGGTACCGATACCTCTTCTCCACCGTCAATGGGCTATCGCAGAACTGATCC  
GTAACCCGAAAATCCTGGCTCAGGCGCAGCAGGAAATCGATAAAGTGGTTGGTAA  
AAACCGTCTGGTTATGGAATCTGATCTGGCGCAGCTGACCTACCTGGAAGCTATCG  
TTAAAGAAATCTTTCGCTGACCCCGAGCACCCCGCTGTCCCTGCCGCGTATCGCGT  
CCGAAAGTTGTGAAATCAACGGCTATTTTCATCCCGAAGGGTAGTACTCTGCTGGTT  
AACGTGTGGGCGATTGCGCGTGATCCGAACCAGTGGGCAGATCCGATCGAATTCCG  
TCCTGAACGCTTCCTGCCGGGTGGTGAAAAACCGAAAGTTGATGTGAAAGGTAACG  
ATTCGAAGTTATCCCGTTCGGCGCTGGCCGCCGATCTGCCAGGTATGTCTCTGG  
GTATCCGTATGGTGCAGCTGATGACCGCGACCCTGATCCATAGCTTCAACTGGGCT  
CTGCCGACCGCCAGCTGCCGATAAACTGAACATGGAAGAAGCGTTCGGTCTGAC  
CCTGCAGCGCGCGGACCCGCTGGTTGTGCACCCGATCCCGCGTCTGGAAGCGCAGG  
TTTACGGCGGTAA

---

trBf3'H ACCCGTCACACCAACCGTCTGCCGCCGGTCCGACCCCGTGGCCGGTTGTTGGTAA  
CCTGCCGCACCTGGGCACTGTTCCGCACCACTCTCTGGCGGCTCTGGCCGGCTAAATA  
CGGTCCGCTGATGCACCTGCGCCTGGGCTTCGTTGATGTTGTTGTGGCTGCGAGCGC  
ATCTGTGGCATCTCAGTTCCTGAAAACCCATGATGCGAACTTCGCCAGCCGCCAC  
CGAACAGCGGCGCAGAACACATCGCTTACA ACTACCAGGATCTGGTTTTTGTCCG  
TACGGCCCCGCTGGCGTATGCTGCGCAAATCTGCAGCGTTCATCTTTCTCCGGT  
AAAGCCCTGGACGATTATCGTCACGTTTCGTCAGGAAGAAGTTGCAATCCTGACCCG  
TGCGCTGGTTGGCGCTGGTAAAGCGCCGGTGA AACTGGGCCAGCTGCTGAACGTGT  
GCACCACCAACGCGCTGGCGCGTGTATGCTGGGCCGTCGTGTATTCGGCGATGGT  
TCTGGTGGTGGCGATCCGAAAGCTGATGAATTCAAAGACATGGTTGTTGAAATGAT

---

---

GGTGCTGGCTGGTGAATTCAACATCGGTGACTTCATCCCGGCGCTGGACTGGCTTG  
ACCTGCAGGGTATTACTAAAAAGATGAAAAACTGCATGCACGTTTCGATAGCTTC  
CTGAACACCATCCTGGAAGAACACAAACCGGGTAAAGGTGGTGCCTCTCACAA  
AGATCTGCTGTCCACTCTGATCTCTCTGAAAGATGACGCAGATGGTGAAGGCGGCA  
AACTGAGCGATATCGAAATCAAAGCGCTGCTGCTGAACCTGTTCTGGCGGGCACC  
GATACCAGCAGCTCCAAAAGTTGAATGGGCCATGGCTGAACTGATCCGTAACCCGAA  
AATCCTGCGTCAGGCACAGGAAGAAATGGATAATGTTGTGGCCGTGACCGTCTGG  
TACTGAATCTGATCTGGGCCAGCTGACCTTCCTGCAGGCGATCGTAAAAGAAACG  
TTCCGCTGCACCCGTCCACCCCGCTGAGCCTGCCGCGCATCTCTAGCGAATCCTGT  
GAAGTGGATGGCTATTACATCCCGAAAGGTTCTACCCTGCTGGTTAACGTTTGGGC  
AATCGCACGTGATCCGAAAATGTGGACCGATCCGCTGGAATTCGTCGACCCGTT  
TCCTGCCGGTGGTAAAAACCGAACGTGGATGTAAGGTAACGATTTTGAAGTG  
ATCCCGTTCGGTGCGGGTCGTCGTATCTGTGTTGGTATCAGCCTGGGCCTGCGTATG  
GTTGAGCTGCTGGTTGCAACCCTGGTGCAGACCTTCGATTGGGAACTGGCTAACGG  
TGTGCAGCCGAAAAACTGAACATGAACGAAGCCTATGGCCTGACCCTGCAGCGTG  
CGAAACCGCTGATCGTTACCCGAAACCGCGTCTGGCGCCGGATGTTGATGAAAGC  
GGTTAA

---

trCmF3'H AACCTGAGCTCCCGTAAAAGCGCGCGCCTGCCGCCGGGCCGACCCCGTGGCCGAT  
CGTGGGCAACCTGCCGCACCTGGGTCCGATCCCGCACACAGCCTGGCGGGCCTGG  
CGAACAAATACGGCCCGCTGATGCATCTGCGTCTGGGTTGCGTGGATGTTGTGGTT  
GCTGCAAGCGCTTCCGTGGCGGCACAGTTCCTGAAAGTTCACGATGCAAACTTCGC  
ATCTCGCCCGCCGAACCTCCGGTGCGAAACACGTGGCGTACAACCTACCAGGATCTGG  
TTTTCGCGCCGTACGGTCCGCGTTGGCGTCTGCTGCGTAAAATTTGCTCTGTTACCC  
TGTTGAGCGCGAAAGCGCTGGATGATTTCCGCCACGTTTCGTCAGGAAGAAGTTGCC  
GTGCTGACCCGTGTTCTGGTAAGCGCGGGTAAACAGCCCGTTTCAGCTGGGTCAGCT  
GCTGAACGTGTGCGCGACCAACGCTCTGGCGCGCGTATGCTGGGCCGCTCGTGTAT  
TCGGCGATGGTATCGATCGTTCTGCGAACGAATTCAAAGACATGGTTGTTGAACTG  
ATGGTTCTGGCGGGCGAATTCAACCTGGGCGATTCATCCCGGTGCTGGACCTGTTT  
GATCTCCAAGGTATTACCAAAAAGATGAAAAACTGCACGTGCGTTTCGATTCTTT  
TCTGTCCAAAATCGTAGAAGAACACAAAACGACCCAGGCGCCTGGGCCACACC  
GATCTGCTGTGCACCCTGATTAGCCTGAAAGACGACGCGGACATCGAAGGCGGCAA  
ACTGACCGATAACCGAAATCAAAGCGCTGCTGCTGAACCTGTTTCGCGGCGGGCACCG  
ACACCAGCTCCAGCACCGTTGAATGGGCCATCGCAGAACTGATTTCGTCACCCGCGAG  
ATCCTGAAACAGGCACGTGAAGAAATTGATGCGGTTGTTGGTACAGGACCGCCTGGT  
GACCGAACTGGATCTGTCTCAGCTGACCTATCTGCAGGCGCTGGTTAAAGAAGTGT  
TCCGTCTGCACCCGAGCACCCCGCTGAGCCTGCCGCGTATTAGCTCCGAAAGCTGT  
GAAGTTGACGGCTACTATATCCCGAAAGGTAGCACCTGCTGGTTAACGTTGTTGGG  
GATCGCGCGTGACCCGAAAATGTGGGCTGACCCGCTGGAATTCGTCGCTCCCGTT  
TCCTTCCGGGCGGCGAAAAACCGGGCGCGGACGTTTCGTGGTAAACGATTTTGAAGTT  
ATCCCGTTCGGTGCAGGTCGTCGATTTGCGCAGGTATGAGCCTGGGCCTGCGTATG  
GTTGAGCTGCTGATTGCAACCCTGGTTTCAGACCTTCGATTGGGAACTGGCTAACGG  
CCTGGAACCGGAAATGCTGAACATGGAAGAAGCCTACGGCCTGACCCTGCAGCGT  
GCGGCACCGCTGATGGTTACCCGAAACCGCGTCTGGCTCCGCACGTTTACGAATC  
TATCTAA

---



**Table S2.** Nucleotide sequences of primers used in this study

| Primers    | Sequences (5'→3')                                   |
|------------|-----------------------------------------------------|
| TAL-F      | TAAGAAGGAGATATACATATGGCTCCCAGGCCAACATCAC            |
| TAL-R      | ATCGCGTGGCCGGCCGATATCTTACGCAAGCATTTTTAACAGCA        |
| CHI-F      | TCATCACCACAGCCAGGATCCGATGGCGGCAAGTATTACAGCTAT       |
| CHI-R      | GCTTGTGACCTGCAGGCGCGCCTTAGTTGCCGATCTTAAACGCA        |
| CHS-F      | TCATCACCACAGCCAGGATCCGATGGTAACAGTTGAAGAGTATAGGAAAGC |
| CHS-R      | GCTTGTGACCTGCAGGCGCGCCTTAGGTAGCCACGCTGTGCA          |
| 4CL-F      | TAAGAAGGAGATATACATATGGGAGACTGTGTAGCTCCCA            |
| 4CL-R      | ATCGCGTGGCCGGCCGATATCTTACTTGGGGAGATCGCCG            |
| trCaF3'H-F | TCATCACCACAGCCAGGATCCGATGAACCGCCGTAGCCTG            |
| trCaF3'H-R | GCATTATGCGGCCGCAAGCTTTTAGTTAGAAACACCATACGCGTTC      |
| trNiF3'H-F | TCATCACCACAGCCAGGATCCGATGTTCCGTAAACGTTATCCGC        |
| trNiF3'H-R | GCATTATGCGGCCGCAAGCTTTTAGCCGATGTACGCCTGCG           |
| trCmF3'H-F | TCATCACCACAGCCAGGATCCGATGAACCTGAGCTCCCCTAAAA        |
| trCmF3'H-R | GCATTATGCGGCCGCAAGCTTTTAGATAGATTTCGTAAACGTGCGG      |
| trLbF3'H-F | TCATCACCACAGCCAGGATCCGATGTTCCGTAAACGCTACCCG         |
| trLbF3'H-R | GCATTATGCGGCCGCAAGCTTTTACATGCCGTAAACCTGCGC          |
| trCnF3'H-F | TCATCACCACAGCCAGGATCCGATGTTCAACCGCCACCCG            |
| trCnF3'H-R | GCATTATGCGGCCGCAAGCTTTTACGCCTGGTACACGTGCG           |
| trThF3'H-F | TCATCACCACAGCCAGGATCCGATGCCGGCGCACCGTCTG            |
| trThF3'H-R | GCATTATGCGGCCGCAAGCTTTTAGCATTCAACAACCTCATAACGCA     |
| trSIF3'H-F | TCATCACCACAGCCAGGATCCATGTTCCGTAAACGTTACCCGG         |
| trSIF3'H-R | GCATTATGCGGCCGCAAGCTTTTAAACCGCCGTAAACCTGCG          |
| trBfF3'H-F | TCATCACCACAGCCAGGATCCGATGACCCGTCACACCAACCG          |
| trBfF3'H-R | GCATTATGCGGCCGCAAGCTTTTAAACCGCTTTCATCAACATCCG       |
| trCPR-F    | GGCAGATCTCAATTGGATATCGATGCGCCGTAGCGGTAGC            |
| trCPR-R    | GGTTTCTTTACCAGACTCGAGTTACCAAACGTCACGCAGGTAA         |
| CPR-F      | GGCAGATCTCAATTGGATATCGATGAGCTCTAGCTCTTCTTCTTACC     |
| 143A-F     | AGATTCTGCAACCGATCCGGTTAACGGTTACC                    |
| 143A-R     | GATCGGTTGCAGAATCTTCGCCGTTACGCTA                     |
| 142A-F     | GAAGATGCATGGACCGATCCGGTTAACGGTTA                    |
| 142A-R     | TCGGTCCATGCATCTTCGCCGTTACGCTACG                     |
| 151A-F     | CGGTTACGCAATGAAAGTTTTCTCCGATGCGA                    |
| 151A-R     | CTTTCATTGCGTAACCGTTAACCGGATCGGTC                    |
| 133A-F     | ACCGGTAAACCGCAGGCAATCCGTAGCGTGAACGGC                |
| 133A-R     | CTGCGGTTTACCGGTGCGCAGGCTGGACGC                      |
| 109A-F     | TTCATGCTGGCACAGACCGGTCCGCTGTCTCA                    |
| 109A-R     | GTCTGTGCCAGCATGAAGTCACCCAGTTCGTC                    |
| 115A-F     | TCCGCTGGCACAGCACCCGGCTGGCCTGACCG                    |
| 115A-R     | GGTGTGTGCCAGCGGACCGGTCTGCAGCAGC                     |
| 110A-F     | GACTTCATGCTGCTGGCAACCGGTCCGCTGTCTCAG                |
| 110A-R     | CAGCAGCATGAAGTCACCCAGTTCGTCACGGG                    |

20A-F GTTCGGTGCAATCAAACCGACCGCAGTTGCGA  
20A-R GTTTGATTGCACCGAACGCGTTGTTCCATGCT  
21A-F AACGCGTTCGGTTACGCAAACCGACCGCAGTTGCG  
21A-R GTAACCGAACGCGTTGTTCCATGCTTCCGCACGAAC  
118A-F TGTCTCAGCACGCAGCTGGCCTGACCGCGTCC  
118A-R AGCTGCGTGCTGAGACAGCGGACCGGTCTGCA  
116A-F TGTCTGCACACCCGGCTGGCCTGACCGCGTCC  
116A-R AGCCGGGTGTGCAGACAGCGGACCGGTCTGCA  
299A-F GGATCTGGCAATGATGGCGGTTCTGGCGCGTG  
299A-R CCATCATTGCCAGATCCAGGCTCAGACGCGCG  
303A-F ATCATGATGGCGGCACTGGCGCGTGGTAAAGAACG  
303A-R AGTGCCGCCATCATGATCAGATCCAGGCTCAG  
300A-F GCTGATATCGGATCCATGGTTGCTGATGAAGAAGTTCGTG  
300A-R CGCCAGAACCGCCATACGGATCAGATCCAGGCTCAGACGC  
155A-F GAAAGTTGCATCCGATGCGATGGCGGCGCACG  
155A-R CATCGGATGCAACTTTCATGTGGTAACCGTTAACC  
249A-F GATCTTGGCAGATTGGTCCGATGAAAGCTGCA  
249A-R ACCAATCTGCCAAGATCCACATCAGCAGAACCA  
211A-F GTGGTATCTCTTTCGCACTGCCGAAATCGTTGCGAAAG  
211A-R CGAAAGAGATACCACGCACCCACGGGAATGCC  
326A-F TTTCACCGCATTTCGTTGTTAAAAACATCAACACCG  
326A-R CAACGAATGCGGTGAAACCCGCTTACGCAGC  
18A-F GCATGGAACAACGCGGCAGGTTACATCAAACCGACCGCAG  
18A-R CGCGTTGTTCCATGCTTCCGCACGAACACGAACTTC  
142-R ATCTTCGCCGTTACGCTACGGATGAACTGCGGTTTAC  
142C-F GTGAACGGCGAAGATTGTTGGACCGATCCGGTTAACGGTTAC  
142D-F GTGAACGGCGAAGATGATTGGACCGATCCGGTTAACGGTTAC  
142E-F GTGAACGGCGAAGATGAATGGACCGATCCGGTTAACGGTTAC  
142F-F GTGAACGGCGAAGATTTTTGGACCGATCCGGTTAACGGTTAC  
142G-F GTGAACGGCGAAGATGGTTGGACCGATCCGGTTAACGGTTAC  
142H-F GTGAACGGCGAAGATCATTGGACCGATCCGGTTAACGGTTAC  
142I-F GTGAACGGCGAAGATATTTGGACCGATCCGGTTAACGGTTAC  
142K-F GTGAACGGCGAAGATAAATGGACCGATCCGGTTAACGGTTAC  
142L-F GTGAACGGCGAAGATCTGTGGACCGATCCGGTTAACGGTTAC  
142M-F GTGAACGGCGAAGATATGTGGACCGATCCGGTTAACGGTTAC  
142N-F GTGAACGGCGAAGATAATTGGACCGATCCGGTTAACGGTTAC  
142P-F GTGAACGGCGAAGATCCGTGGACCGATCCGGTTAACGGTTAC  
142Q-F GTGAACGGCGAAGATCAGTGGACCGATCCGGTTAACGGTTAC  
142R-F GTGAACGGCGAAGATCGTTGGACCGATCCGGTTAACGGTTAC  
142T-F GTGAACGGCGAAGATACCTGGACCGATCCGGTTAACGGTTAC  
142V-F GTGAACGGCGAAGATGTTTGGACCGATCCGGTTAACGGTTAC  
142W-F GTGAACGGCGAAGATTGGTGGACCGATCCGGTTAACGGTTAC  
142Y-F GTGAACGGCGAAGATTATTGGACCGATCCGGTTAACGGTTAC  
115-R CAGCGGACCGGTCTGCAGCAGCATGAAGTCACCCAG

115C-F CAGACCGGTCCGCTGTGTCAGCACCCGGCTGGCCTG  
115D-F CAGACCGGTCCGCTGGATCAGCACCCGGCTGGCCTG  
115E-F CAGACCGGTCCGCTGGAACAGCACCCGGCTGGCCTG  
115F-F CAGACCGGTCCGCTGTTTCAGCACCCGGCTGGCCTG  
115G-F CAGACCGGTCCGCTGGGTCAGCACCCGGCTGGCCTG  
115H-F CAGACCGGTCCGCTGCATCAGCACCCGGCTGGCCTG  
115I-F CAGACCGGTCCGCTGATTCAGCACCCGGCTGGCCTG  
115K-F CAGACCGGTCCGCTGAAACAGCACCCGGCTGGCCTG  
115L-F CAGACCGGTCCGCTGCTGCAGCACCCGGCTGGCCTG  
115M-F CAGACCGGTCCGCTGATGCAGCACCCGGCTGGCCTG  
115N-F CAGACCGGTCCGCTGAATCAGCACCCGGCTGGCCTG  
115P-F CAGACCGGTCCGCTGCCGCAGCACCCGGCTGGCCTG  
115Q-F CAGACCGGTCCGCTGCAGCAGCACCCGGCTGGCCTG  
115R-F CAGACCGGTCCGCTGCGTCAGCACCCGGCTGGCCTG  
115T-F CAGACCGGTCCGCTGACCAGCACCCGGCTGGCCTG  
115V-F CAGACCGGTCCGCTGGTTCAGCACCCGGCTGGCCTG  
115W-F CAGACCGGTCCGCTGTGGCAGCACCCGGCTGGCCTG  
115Y-F CAGACCGGTCCGCTGTATCAGCACCCGGCTGGCCTG  
133-R CTGCGGTTTACCGGTGCGCAGGCTGGACGCGGTC  
133C-F ACCGGTAAACCGCAGTCTATCCGTAGCGTGAACGGCGAAGATTCTTGG  
133D-F ACCGGTAAACCGCAGGATATCCGTAGCGTGAACGGCGAAGATTCTTGG  
133E-F ACCGGTAAACCGCAGGAAATCCGTAGCGTGAACGGCGAAGATTCTTGG  
133G-F ACCGGTAAACCGCAGGGTATCCGTAGCGTGAACGGCGAAGATTCTTGG  
133H-F ACCGGTAAACCGCAGCATATCCGTAGCGTGAACGGCGAAGATTCTTGG  
133I-F ACCGGTAAACCGCAGATTATCCGTAGCGTGAACGGCGAAGATTCTTGG  
133K-F ACCGGTAAACCGCAGAAAATCCGTAGCGTGAACGGCGAAGATTCTTGG  
133L-F ACCGGTAAACCGCAGCTGATCCGTAGCGTGAACGGCGAAGATTCTTGG  
133M-F ACCGGTAAACCGCAGATGATCCGTAGCGTGAACGGCGAAGATTCTTGG  
133N-F ACCGGTAAACCGCAGAATATCCGTAGCGTGAACGGCGAAGATTCTTGG  
133P-F ACCGGTAAACCGCAGCCGATCCGTAGCGTGAACGGCGAAGATTCTTGG  
133Q-F ACCGGTAAACCGCAGCAGATCCGTAGCGTGAACGGCGAAGATTCTTGG  
133R-F ACCGGTAAACCGCAGCGTATCCGTAGCGTGAACGGCGAAGATTCTTGG  
133S-F ACCGGTAAACCGCAGAGCATCCGTAGCGTGAACGGCGAAGATTCTTGG  
133T-F ACCGGTAAACCGCAGACCATCCGTAGCGTGAACGGCGAAGATTCTTGG  
133V-F ACCGGTAAACCGCAGGTTATCCGTAGCGTGAACGGCGAAGATTCTTGG  
133W-F ACCGGTAAACCGCAGTGGATCCGTAGCGTGAACGGCGAAGATTCTTGG  
133Y-F ACCGGTAAACCGCAGTATATCCGTAGCGTGAACGGCGAAGATTCTTGG  
metA-M1-F TAAGGAGATATACCATGGGCATGCCGATTCGTGTGCCG  
pRSF-R GCCCATGGTATATCTCCTTATTAAGTTAAAC  
metA-cysE-R TCCAGTTCTTACACGACATGGTATATCTCCTTTTAATCCAGCGTTGGATTCATGT  
GC  
cysE-metA-R ATGTCGTGTGAAGAACTGGAAATTG  
pRSF-M1-F AAGCTTGCGGCCGCATAAT  
metK-M2-F GAAGGAGATATACATATGGCAATGGCAAAACACCTTTTTACGTC

|                        |                                                                 |
|------------------------|-----------------------------------------------------------------|
| pRSF-M2-R              | TGCCATATGTATATCTCCTTCTTATACTTAACTAATATACTAAG                    |
| pRSF-F                 | ACCTAGGCTGCTGCCACC                                              |
| metK-M2-R              | GCGGTGGCAGCAGCCTAGGTTTACTTCAGACCGGCAGCATC                       |
| ydaO-M2-F              | GAAGGAGATATACATATGGCAATGTATCATTCAATCAAACGTTTTTTGATTGGG          |
| ydaO-M2-R              | GCGGTGGCAGCAGCCTAGGTTTACTTTTTAAAATGATACGGCAGTGTGG               |
| metK-ydaO-F            | CGTATCATTTTTAAAAAGTAAAAGGAGATATACCATGGCAAAACACCTTTTTACGT<br>CC  |
| ydaO-metK-R            | TTACTTTTTAAAATGATACGGCAGTGTGGCA                                 |
| Mp <sup>142V</sup> -F  | ACCTGCGTGACGTTTGGTAAAAGGAGATATACCATGGTTGCTGATGAAGAAGTTC<br>GTG  |
| CPR-R                  | TTACCAAACGTACGCAGGTAAC                                          |
| Mp <sup>142V</sup> -R1 | GCGGTGGCAGCAGCCTAGGTTTACGGGTACGCTTCGATAACGAATTC                 |
| TongYong-R             | TGCTAGTTATTGCTCAGCGG                                            |
| cysE-M1-R              | CATTATGCGGCCGCAAGCTTTTAGATCCCATCCCATACTCAAATG                   |
| metK-F1                | GTTATCGAAGCGTACCCGTAAAAGGAGATATACCATGGCAAAACACCTTTTTACG<br>TCCG |
| Mp <sup>142V</sup> -R2 | TTACGGGTACGCTTCGATAACG                                          |
| metK-R1                | CTTTATCTTTTAAATCTGTATACATGGTATATCTCCTTTTACTTCAGACCGGCAGC<br>ATC |

---

**Table S3.** Binding energies of 27 selected F3THs with the two ligands

| No. | Sources                                            | Accession No.  | Homology Model                               | Binding Energy kJ mol <sup>-1</sup>    |                                            |
|-----|----------------------------------------------------|----------------|----------------------------------------------|----------------------------------------|--------------------------------------------|
|     |                                                    |                |                                              | (2 <i>S</i> )-Naringenin<br>(Ligand 1) | (2 <i>S</i> )-Isosakuranetin<br>(Ligand 2) |
| 1   | <i>Glycine max</i>                                 | NM_001250086.3 |                                              | -36.40                                 | -37.24                                     |
| 2   | <i>Bidens ferulifolia</i>                          | FJ216427.1     |                                              | -35.15                                 | -34.73                                     |
| 3   | <i>Salvia miltiorrhiza</i>                         | MH447668.1     |                                              | -35.98                                 | -35.15                                     |
| 4   | <i>Solanum lycopersicum</i>                        | NM_001302915.2 |                                              | -36.40                                 | -35.15                                     |
| 5   | <i>Chromolaena odorata</i>                         | HQ268505.1     |                                              | -36.40                                 | -37.24                                     |
| 6   | <i>Gerbera hybrid</i>                              | DQ218417.1     |                                              | -37.24                                 | -34.73                                     |
| 7   | <i>Ipomoea batatas</i> cultivar<br><i>Yubeibai</i> | HM460344.1     |                                              | -37.66                                 | -35.56                                     |
| 8   | <i>Canarium album</i>                              | KY189088.1     |                                              | -37.24                                 | -36.40                                     |
| 9   | <i>Lycium barbarum</i>                             | KY305424.1     |                                              | -38.91                                 | -36.82                                     |
| 10  | <i>Nelumbo nucifera</i>                            | KX176842.1     |                                              | -36.40                                 | -36.40                                     |
| 11  | <i>Paeonia lutea</i>                               | KP772224.1     |                                              | -36.82                                 | -35.98                                     |
| 12  | <i>Camellia nitidissima</i>                        | HQ290518.1     |                                              | -38.49                                 | -37.66                                     |
| 13  | <i>Chrysanthemum x morifolium</i>                  | AB523844.1     | CYP76AH1 from                                | -35.15                                 | -35.13                                     |
| 14  | <i>Lobelia erinus</i>                              | AB221082.1     | <i>Salvia miltiorrhiza</i><br>(PDB ID: 5ylw) | -36.40                                 | -35.15                                     |
| 15  | <i>Gentiana triflora</i>                           | AB193313.1     |                                              | -39.33                                 | -38.91                                     |
| 16  | <i>Arabidopsis thaliana</i>                        | AF271651.1     |                                              | -36.40                                 | -35.15                                     |
| 17  | <i>Brassica napus</i>                              | DQ324379.1     |                                              | -36.82                                 | -36.40                                     |
| 18  | <i>Vitis vinifera</i>                              | NM_001280987.1 |                                              | -37.66                                 | -38.49                                     |
| 19  | <i>Calystegia pubescens</i>                        | AB571798.1     |                                              | -35.56                                 | -35.98                                     |
| 20  | <i>Garcinia mangostana</i>                         | FJ197132.1     |                                              | -36.40                                 | -35.15                                     |
| 21  | <i>Allium cepa</i>                                 | AY541035.1     |                                              | -36.82                                 | -37.24                                     |
| 22  | <i>Nicotiana tabacum</i>                           | KF856279.1     |                                              | -37.24                                 | -35.56                                     |
| 23  | <i>Cichorium intybus</i>                           | FJ753548.1     |                                              | -35.56                                 | -35.98                                     |
| 24  | <i>Euphorbia pulcherrima</i>                       | KY489667.1     |                                              | -36.82                                 | -36.82                                     |
| 25  | <i>Perilla frutescens</i> var.<br><i>crispa</i>    | AB045593.1     |                                              | -37.66                                 | -38.07                                     |
| 26  | <i>Tricyrtis hirta</i>                             | AB480691.1     |                                              | -37.66                                 | -37.24                                     |
| 27  | <i>Prunus cerasifera</i>                           | KP772279.1     |                                              | -38.07                                 | -38.91                                     |

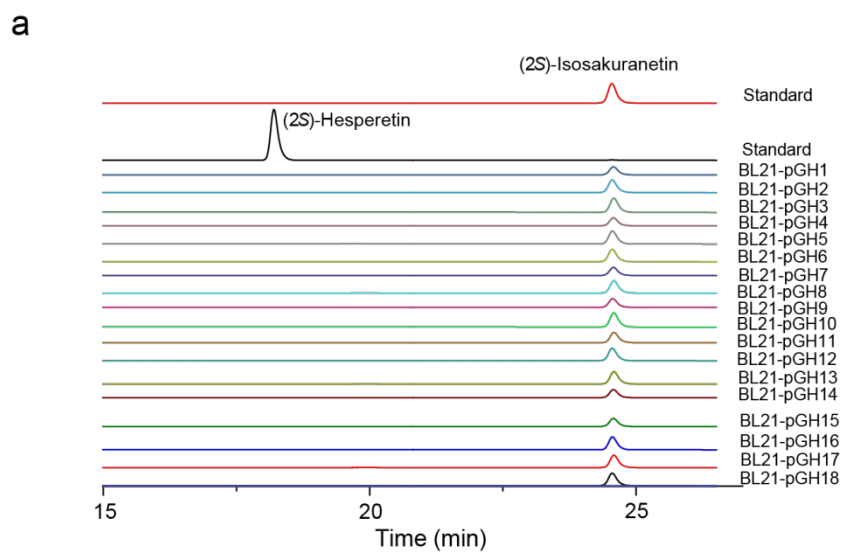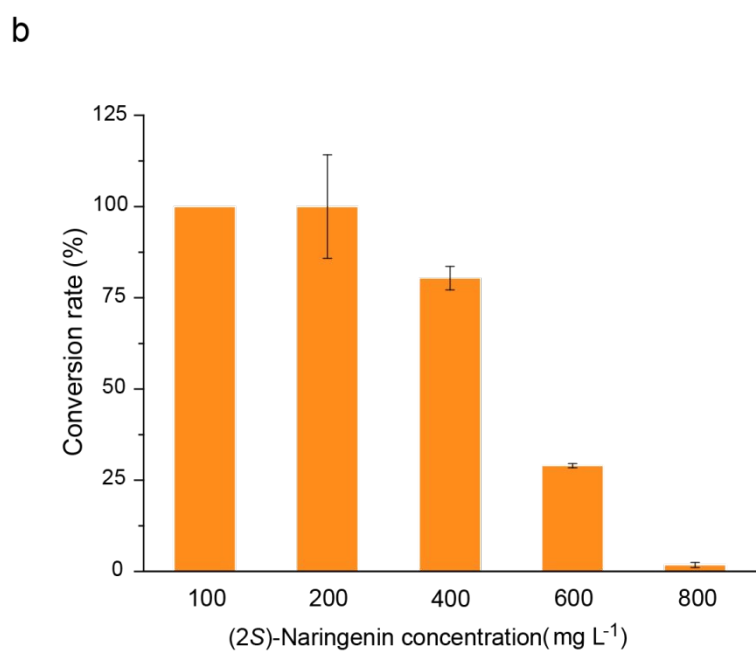

**Figure S1. (a)** HPLC analysis of (2S)-hesperetin in *E. coli* cultures harboring plasmid pNH1-18.

**(b)** Conversion of (2S)-naringenin by the strain containing trThF3'H and CPR.

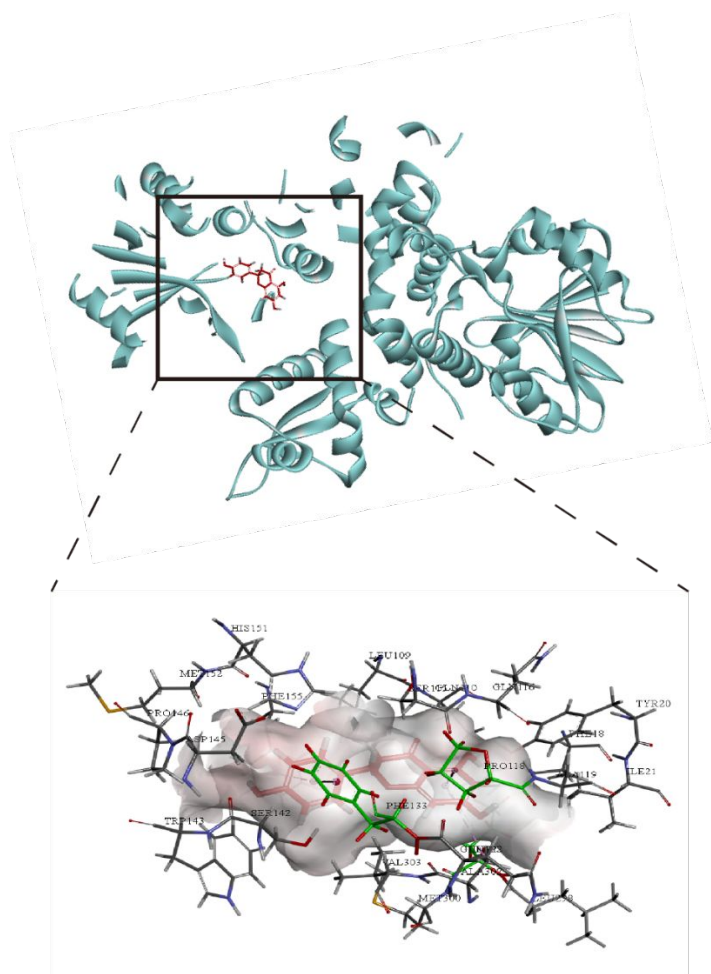

**Figure S2.** Active site residues surrounding the docked (2*S*)-naringenin. (2*S*)-Naringenin is shown in red with its surface in white. Residues selected for alanine scanning are marked by different colors.

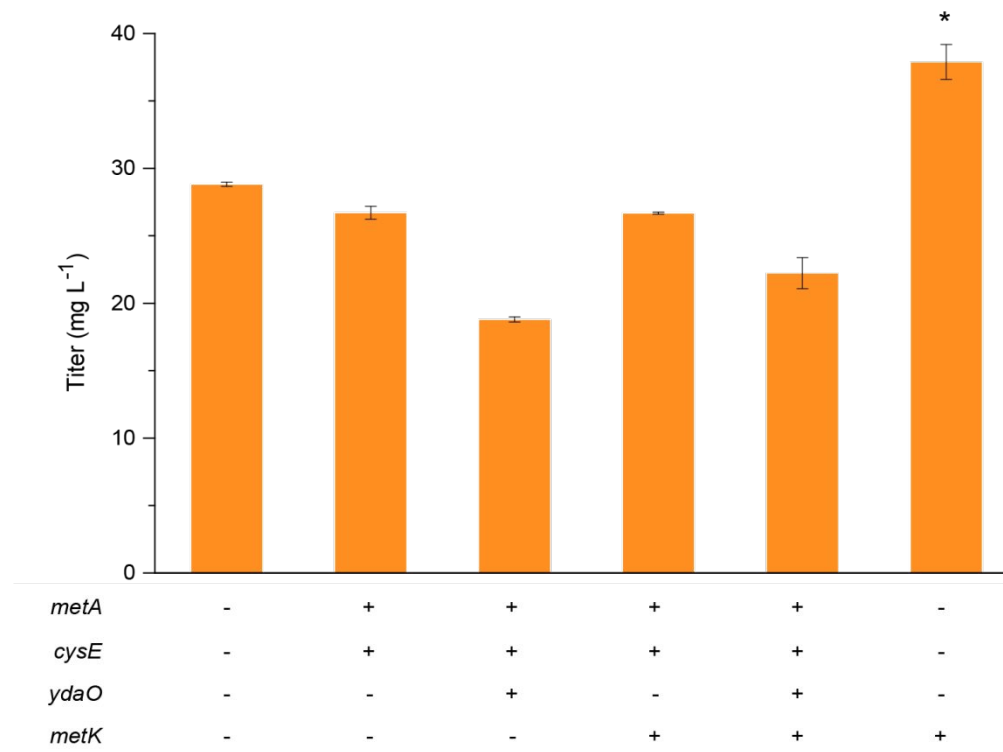

**Figure S3.** Metabolic engineering strategy aimed at increasing (2*S*)-hesperetin production. MetA:

homoserine succinyltransferase; *cysE*: L-serine *O*-acetyltransferase; *metK*: methionine adenosyltransferase.
